# Supplementary material
Source: publisher site journal article supplement (http://www.kjim.org/upload/media/kjim-2021-409-suppl1.pdf)
Supplement: Supplementary file 1 [file kjim-2021-409-suppl1.pdf]

**Supplementary Table 1. Baseline characteristic of study participants**

| Characteristic                           | Mild COVID-19<br>(n = 12) | Severe COVID-19<br>(n = 41) | ChAdOx1<br>(n = 37) | BNT161b2<br>(n = 36) | p value |
|------------------------------------------|---------------------------|-----------------------------|---------------------|----------------------|---------|
| Age, yr                                  | 41 (33–51)                | 71 (61–77)                  | 40 (33–46)          | 32 (26–36)           | < 0.001 |
| Age group                                |                           |                             |                     |                      | < 0.001 |
| 20s                                      | 2 (16.7)                  | 0                           | 4 (10.8)            | 16 (44.4)            |         |
| 30s                                      | 3 (25.0)                  | 0                           | 13 (35.1)           | 15 (41.7)            |         |
| 40s                                      | 3 (25.0)                  | 0                           | 15 (40.5)           | 4 (11.1)             |         |
| 50s                                      | 3 (25.0)                  | 9 (22.0)                    | 4 (10.8)            | 1 (2.8)              |         |
| 60s and above                            | 1 (8.3)                   | 32 (78.0)                   | 1 (2.7)             | 0                    |         |
| Sex                                      |                           |                             |                     |                      | 0.075   |
| Female                                   | 8 (66.7)                  | 15 (36.6)                   | 22 (59.5)           | 22 (61.1)            |         |
| Male                                     | 4 (33.3)                  | 26 (63.4)                   | 15 (40.5)           | 14 (38.9)            |         |
| Underlying diseases                      |                           |                             |                     |                      |         |
| Hypertension                             | 3 (25.0)                  | 25 (61.0)                   | 3 (8.1)             | 0                    | < 0.001 |
| Diabetes mellitus                        | 0                         | 10 (24.4)                   | 1 (2.7)             | 0                    | < 0.001 |
| Cardiovascular disease                   | 0                         | 5 (12.2)                    | 0 (0.0)             | 0                    | 0.013   |
| Chronic lung disease                     | 0                         | 6 (14.6)                    | 0 (0.0)             | 0                    | 0.005   |
| Chronic kidney disease                   | 0                         | 4 (9.8)                     | 1 (2.7)             | 0                    | 0.125   |
| Chronic liver disease                    | 1 (8.3)                   | 2 (4.9)                     | 0                   | 0                    | 0.194   |
| Solid cancer                             | 1 (8.3)                   | 4 (9.8)                     | 0                   | 0                    | 0.065   |
| Hematologic malignancy                   | 1 (8.3)                   | 3 (7.3)                     | 0                   | 0                    | 0.126   |
| Smoking                                  | 0                         | 2 (4.9)                     | 0                   | 0                    | 0.239   |
| Pregnancy                                | 1 (8.3)                   | 0                           | 0                   | 0                    | 0.023   |
| Treatment                                |                           |                             |                     |                      |         |
| Steroid                                  | 0                         | 25 (61)                     | NA                  | NA                   | < 0.001 |
| Remdesivir                               | 0                         | 30 (73.2)                   | NA                  | NA                   | < 0.001 |
| Convalescent plasma therapy <sup>a</sup> | 0                         | 7 (17.1)                    | NA                  | NA                   | 0.329   |
| Immunomodulator <sup>b</sup>             | 0                         | 7 (17.1)                    | NA                  | NA                   | 0.329   |
| Clinical course                          |                           |                             | NA                  | NA                   | 0.576   |
| Discharge as protocol <sup>c</sup>       | 12 (100)                  | 36 (87.8)                   | NA                  | NA                   |         |
| Death                                    | 0                         | 5 (12.2)                    | NA                  | NA                   |         |

Values are presented as median (interquartile range) or number (%).

COVID-19, coronavirus disease 2019; NA, not applicable.

<sup>a</sup>Including GC5131 of GC pharma and Rekirona (CT-P59, regdanvimab) of Celltrion.

<sup>b</sup>Including baricitinib and tocilizumab.

<sup>c</sup>10 days pass from date of diagnosis without clinical symptoms or two consecutive negative results of PCR test at 24-hour interval without clinical symptoms.
